# Supplementary material
Source: Springer Nature journal article supplement (https://www.springermedizin.de/resource/supplementary/13049_2012_571_MOESM4_ESM.pdf/9666838)
Supplement: MOESM4 [file 9666838]

**11011 unique references from the literature search**

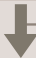

**120 publications read in fulltext**

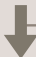

**One systematic review judged regarding quality**

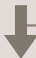

**No studies included**

10891 references excluded based on title og abstract

119 studies excluded, failed to fulfill the inclusion criteria

One systematic review judged to be of low quality
